# Supplementary figures and images for: Factors associated with peritraumatic stress symptoms among the frontline healthcare workers during the outbreak of COVID-19 in China
Source: HighWire-hosted journal article supplement (doi:10.1136/bmjopen-2020-047753), 2022-01-01

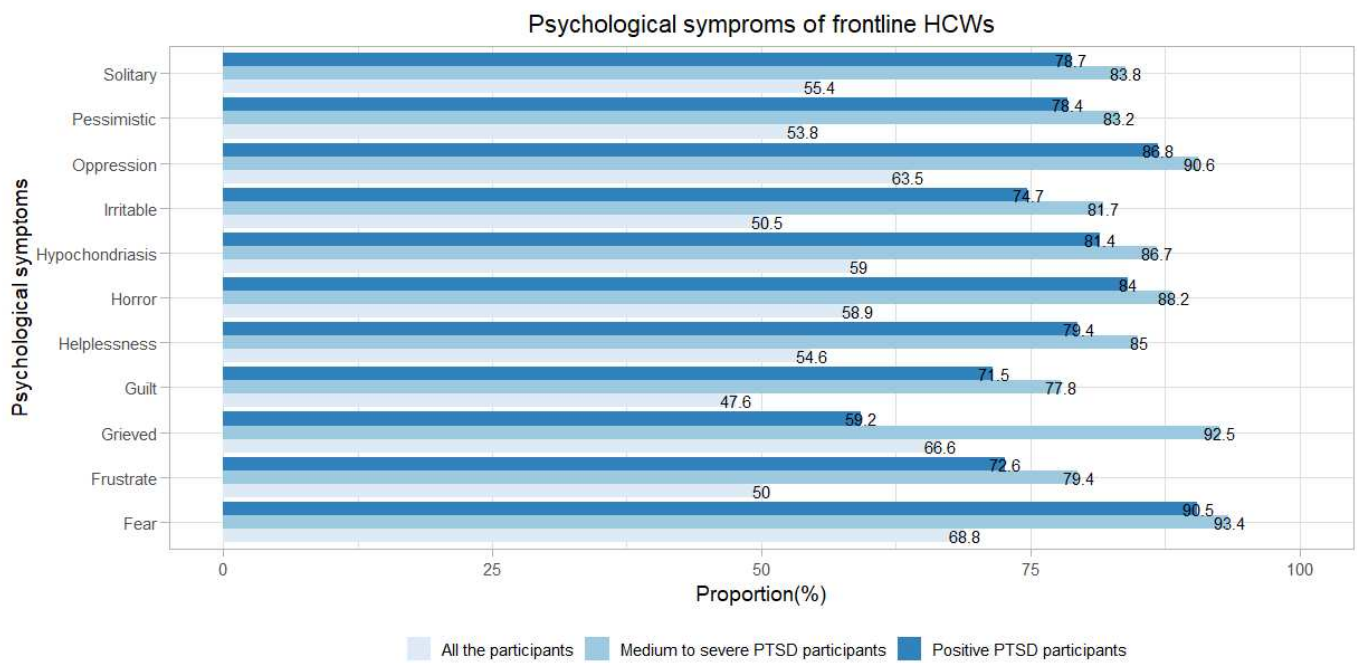

Supplement: bmjopen-2020-047753supp003_data_supplement.pdf [file bmjopen-2020-047753supp003_data_supplement.pdf]
